# Supplementary material for: Four crystal structures of human LLT1, a ligand of human NKR-P1, in varied glycosylation and oligomerization states
Source: PubMed Central journal article supplement (PMC4356368; doi:10.1107/s1399004714027928), 2015-02-26
Supplement: d-71-00578-sup1.pdf [file d-71-00578-sup1.pdf]

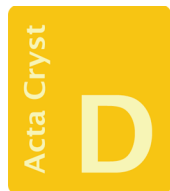

BIOLOGICAL  
CRYSTALLOGRAPHY

**Volume 71 (2015)**

**Supporting information for article:**

**Four crystal structures of human LLT1, a ligand for human NKR-P1,  
in varied glycosylation and oligomerization states**

**Tereza Skálová, Jan Bláha, Karl Harlos, Jarmila Dušková, Tomáš Koval', Jan  
Stránský, Jindřich Hašek, Ondřej Vaněk and Jan Dohnálek**

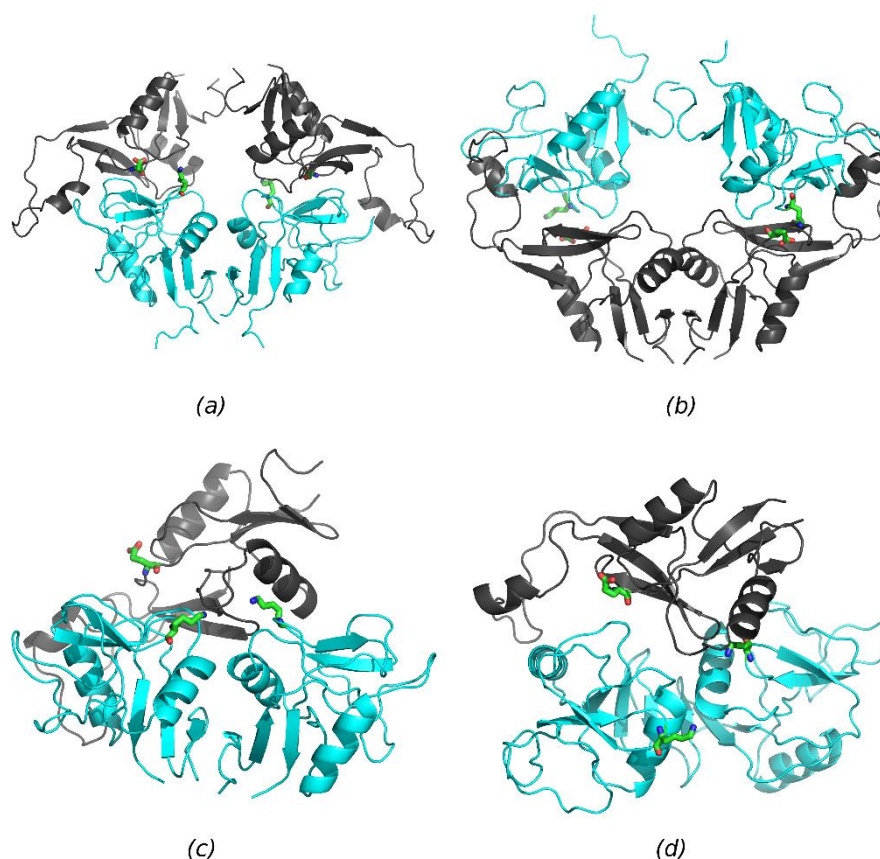

**Figure S1** Discussed models of NKR-P1:LLT1 interaction. LLT1 cyan, model of NKR-P1 black. Residues LLT1 Lys169 and NKR-P1 Glu205 important for the interaction (Kamishikiryo *et al.*, 2011) are shown as green sticks. (a) Model based on the NKp65:KACL structure (PDB code 4iop, Li *et al.*, 2013), NKR-P1 is placed in position of NKp65 and LLT1 in position of KACL. (b) Model based on the same structure, but NKR-P1 takes the position of KACL and LLT1 of NKp65. (c, d) Model based on hexameric packing of LLT1\_glyco. LLT1 dimer is in its position from the observed hexamer and NKR-P1 in the position of the closest LLT1 monomer in the hexamer. (d) A view from the "top" – from the termini distal side.
